# Supplementary material for: On the Structural and Molecular Properties of PEO and PEO-PPG Functionalized Chitosan Nanoparticles for Drug Delivery
Source: Preprints.org preprint supplement (doi:10.20944/preprints202402.0465.v1), 2024-02-08
Supplement: Supplementary file 1 [file supplementary]

**Supplementary Materials**

**On the Structural and Molecular Properties of PEO and PEO-PPG Functionalized Chitosan Nanoparticles for Drug Delivery**

Rejeena Jha1, Hyrum Harlow1, Mourad Benamara2, Robert A. Mayanovic1*

1 Department of Physics, Astronomy, and Materials Science, Missouri State University, Springfield, MO 65804, USA

2 University of Arkansas Nano-Bio Materials Characterization Facility, University of Arkansas, Fayetteville, AR 72701, USA

* Correspondence: robertmayanovic@missouristate.edu


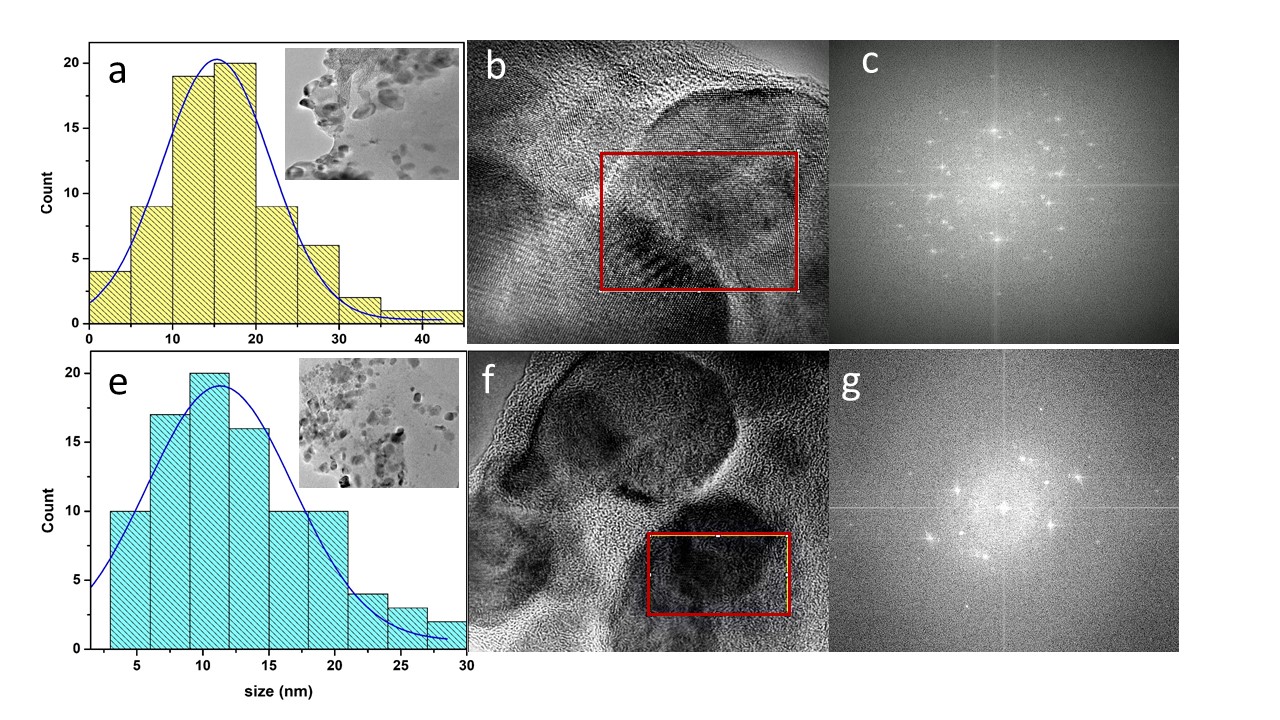


Figure S1. a) Size distribution histogram calculated from TEM data (inset shows a TEM image), b) a HRTEM image and c) a FFT of the region delineated by the rectangle shown in b) of sample CNP-0.5%; d) size distribution histogram and a corresponding a TEM image shown in the inset, e) a HRTEM image and f) a FFT of the region outlined by the rectangle in e) of sample 1% CNP-PEO.


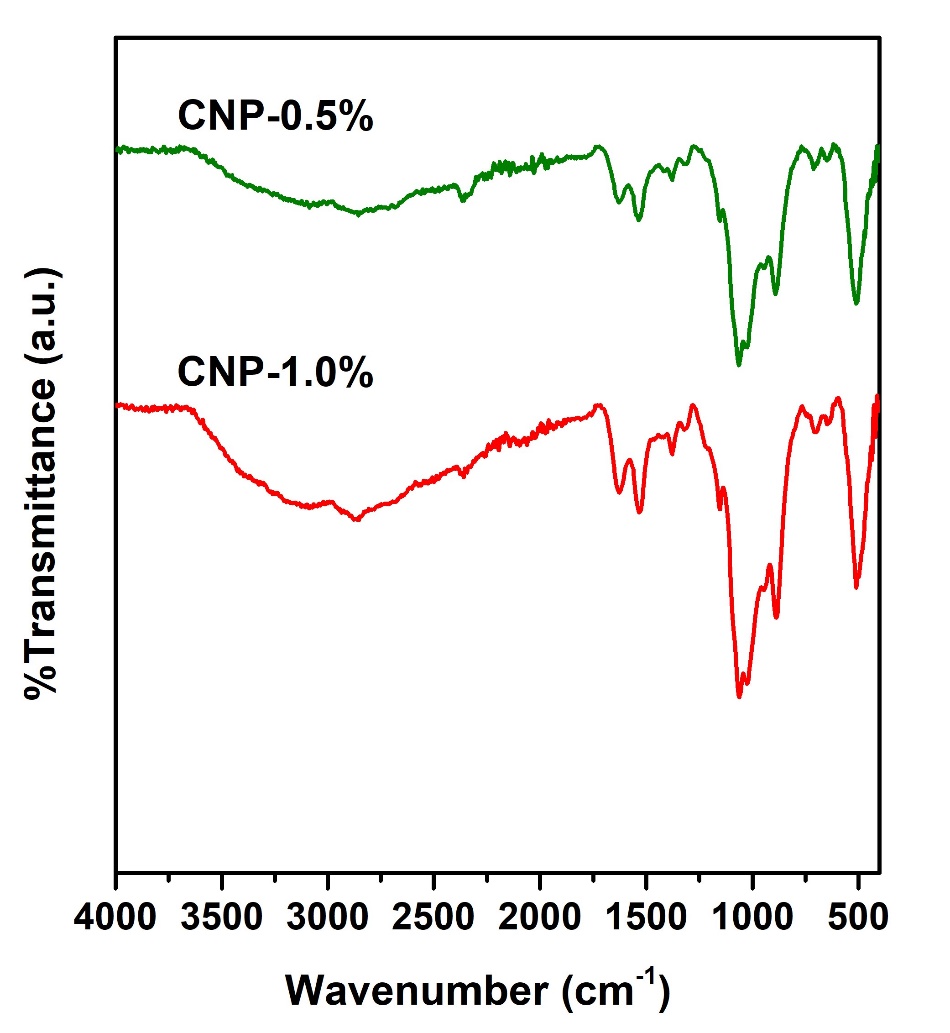


Figure S2. FTIR spectra measured from the CNP-1.0% and CNP-0.5% samples indicating negligible concentration dependence.
